# Supplementary material
Source: Springer Nature journal article supplement (https://www.springermedizin.de/resource/supplementary/12905_2013_365_MOESM1_ESM.pdf/9518568)
Supplement: MOESM1 [file 9518568]

### The Premenstrual Coping Measure

Women cope with their premenstrual experience in a variety of ways. We are interested in what you do when you are premenstrual. Tick the response choice which indicates how the following statements apply to your premenstrual experience.

| <b>Coping Statements</b>                                                           | <b>Doesn't<br/>apply to<br/>me</b> | <b>Seldom<br/>applies<br/>to me</b> | <b>Some-<br/>times<br/>applies<br/>to me</b> | <b>Applies<br/>to me</b> | <b>Almost<br/>always<br/>applies to<br/>me</b> |
|------------------------------------------------------------------------------------|------------------------------------|-------------------------------------|----------------------------------------------|--------------------------|------------------------------------------------|
| 1. I avoid situations that have the potential to provoke me                        |                                    |                                     |                                              |                          |                                                |
| 2. I avoid people that have the potential to provoke me                            |                                    |                                     |                                              |                          |                                                |
| 3. I avoid raising topics that have the potential to create conflict               |                                    |                                     |                                              |                          |                                                |
| 4. I remove myself from a situation if it starts to provoke me                     |                                    |                                     |                                              |                          |                                                |
| 5. I avoid situations where I know I will feel vulnerable                          |                                    |                                     |                                              |                          |                                                |
| 6. I avoid having conversations that are liable to upset me                        |                                    |                                     |                                              |                          |                                                |
| 7. I try to avoid dealing with difficult family issues                             |                                    |                                     |                                              |                          |                                                |
| 8. I challenge my negative thoughts                                                |                                    |                                     |                                              |                          |                                                |
| 9. I accept my changeable moods                                                    |                                    |                                     |                                              |                          |                                                |
| 10. I am aware that my premenstrual changes are only temporary                     |                                    |                                     |                                              |                          |                                                |
| 11. I think it is okay to be feeling differently when I am premenstrual            |                                    |                                     |                                              |                          |                                                |
| 12. I am aware of my bodily changes                                                |                                    |                                     |                                              |                          |                                                |
| 13. I think it is okay to be more emotional or sensitive when I am premenstrual    |                                    |                                     |                                              |                          |                                                |
| 14. I am aware of my emotional changes                                             |                                    |                                     |                                              |                          |                                                |
| 15. I think that my premenstrual changes are a normal part of a woman's experience |                                    |                                     |                                              |                          |                                                |

| <b>Coping Statements</b>                                                                | <b>Doesn't<br/>apply to<br/>me</b> | <b>Seldom<br/>applies<br/>to me</b> | <b>Some-<br/>times<br/>applies<br/>to me</b> | <b>Applies<br/>to me</b> | <b>Almost<br/>always<br/>applies to<br/>me</b> |
|-----------------------------------------------------------------------------------------|------------------------------------|-------------------------------------|----------------------------------------------|--------------------------|------------------------------------------------|
| 16. I know that other women go through this                                             |                                    |                                     |                                              |                          |                                                |
| 17. I think it is okay that my physical needs may be different                          |                                    |                                     |                                              |                          |                                                |
| 18. I know what I need to do to support myself                                          |                                    |                                     |                                              |                          |                                                |
| 19. I vent my feelings through emotional outbursts                                      |                                    |                                     |                                              |                          |                                                |
| 20. I decrease my social activities                                                     |                                    |                                     |                                              |                          |                                                |
| 21. I focus less on the needs of others                                                 |                                    |                                     |                                              |                          |                                                |
| 22. I exercise less                                                                     |                                    |                                     |                                              |                          |                                                |
| 23. I eat more sugary foods                                                             |                                    |                                     |                                              |                          |                                                |
| 24. I spend time doing things that help me relax e.g. have a bath, massage, read a book |                                    |                                     |                                              |                          |                                                |
| 25. I take time to focus on my own needs                                                |                                    |                                     |                                              |                          |                                                |
| 26. I allow myself extra time to rest                                                   |                                    |                                     |                                              |                          |                                                |
| 27. I do things to make myself more comfortable                                         |                                    |                                     |                                              |                          |                                                |
| 28. I feel confident to tell people how I feel                                          |                                    |                                     |                                              |                          |                                                |
| 29. I feel confident to tell people what I need                                         |                                    |                                     |                                              |                          |                                                |
| 30. I tell others about how I am feeling                                                |                                    |                                     |                                              |                          |                                                |
| 31. I try not to express how I am feeling                                               |                                    |                                     |                                              |                          |                                                |
| 32. I ask for help from others                                                          |                                    |                                     |                                              |                          |                                                |

**Note to researchers**

The PMCM has five subscales representing five premenstrual coping processes. The subscales are:-

Avoiding Harm: Items 1 – 8

Awareness and Acceptance of Premenstrual Change: Items 9 – 18

Adjusting Energy: Items 19 – 23

Self-Care: Items 24-27

Communicating: Items 28 - 32

Scoring is calculated on a 5-point scale with 1 being *Doesn't apply to me* and 5 being *Almost always applies to me*.

No total score is calculated.

Item 31 requires reverse scoring.
